# Supplementary material for: Growing Trend of Fighting Infections in Aquaculture Environment—Opportunities and Challenges of Phage Therapy
Source: PubMed Central journal article supplement (PMC7345527; doi:10.3390/antibiotics9060301), 2020-06-04
Supplement: antibiotics-09-00301-s001.pdf [file antibiotics-09-00301-s001.pdf]

**Table S1.** Application of bacteriophages to control pathogenic bacteria in aquaculture environment.

|   | <b>Treated aquaculture product</b>                         | <b>Bacterial pathogen</b>      | <b>Bacteriophage, its source and way of administration</b>                                                                                                                                                                                                | <b>Results of phage therapy</b>                             | <b>Reference</b> |
|---|------------------------------------------------------------|--------------------------------|-----------------------------------------------------------------------------------------------------------------------------------------------------------------------------------------------------------------------------------------------------------|-------------------------------------------------------------|------------------|
| 1 | Shrimp larvae<br>( <i>Penaeus monodon</i> )                | <i>Vibrio harveyi</i>          | Phages were isolated from water samples from shrimp farm, hatcheries and seawater and were added directly to water                                                                                                                                        | Reduced mortality of larvae                                 | [33]             |
| 2 | Shrimp larvae<br>( <i>Penaeus monodon</i> )                | <i>Vibrio harveyi</i>          | Bacteriophages Viha10 and Viha8 isolated from oyster tissue and shrimp hatchery samples were added directly to water on alternative days                                                                                                                  | Reduction of bacterial biofilm; reduced mortality of larvae | [78]             |
| 3 | Shrimp larvae<br>( <i>Penaeus monodon</i> )                | <i>Vibrio harveyi</i>          | Bacteriophages VHM1, VHM2, and VHS1 were applied alone and in different cocktail combinations; they were isolated from water suspended sediments of the distinctive <i>P. monodon</i> shrimp aquaculture environment; phages were directly added to water | Reduced mortality of larvae                                 | [37]             |
| 4 | Abalone ( <i>Haliotis laevis</i> )                         | <i>Vibrio harveyi</i>          | Two phages from the family <i>Siphoviridae</i> were isolated from hatchery water and oyster tissue samples; abalones were exposed to bacteriophages for 2 hours and then washed with sea water                                                            | Reduced mortality of abalone                                | [18]             |
| 5 | Marine shrimp<br>( <i>Penaeus vannamei</i> )               | <i>Vibrio parahaemolyticus</i> | Siphoviridae phage pVp-1, isolated from the coastal water of the Yellow Sea in Korea, was fed to shrimps in form of pellets or shrimps were immersed in phage                                                                                             | Prophylactic activity of bacteriophages                     | [84]             |
| 6 | Whiteleg shrimp larvae ( <i>Litopenaeus vannamei</i> )     | <i>Vibrio parahaemolyticus</i> | A3S and Vpms1 phages isolated from shrimp and clams cultures were directly added to water                                                                                                                                                                 | Reduced infection and mortality of shrimp                   | [80]             |
| 7 | Axenic brine shrimp nauplii ( <i>Artemia franciscana</i> ) | <i>Vibrio parahaemolyticus</i> | Vpms1 phage isolated from samples of the clam <i>Megapitaria squalida</i> collected from La Paz bay, B.C.S. México; phage was directly added to water                                                                                                     | Prevention of vibriosis                                     | [76]             |

|    | <b>Treated aquaculture product</b>                                                     | <b>Bacterial pathogen</b>                                                                            | <b>Bacteriophage, its source and way of administration</b>                                                                                                                         | <b>Results of phage therapy</b>                               | <b>Reference</b> |
|----|----------------------------------------------------------------------------------------|------------------------------------------------------------------------------------------------------|------------------------------------------------------------------------------------------------------------------------------------------------------------------------------------|---------------------------------------------------------------|------------------|
| 8  | Oyster meat                                                                            | <i>Vibrio parahaemolyticus</i>                                                                       | Bacteriophage OMN was isolated from Atlantic Sea water and applied to the oyster meat in presence of bacteria                                                                      | Reduced bacteria concentration in oyster meat                 | [19]             |
| 9  | Oysters ( <i>Ostrea plicatula</i> )                                                    | <i>Vibrio parahaemolyticus</i>                                                                       | Bacteriophage VPp1 isolated from sewage samples were added to water during depuration process                                                                                      | Reduced bacteria number in oysters                            | [81]             |
| 10 | Sea cucumber ( <i>Apostichopus japonicus</i> )                                         | <i>Vibrio alginolyticus</i>                                                                          | Two bacteriophages isolated from the drainpipe of an aquatic market were directly added to water                                                                                   | Reduced mortality of sea cucumbers                            | [20]             |
| 11 | Prey ( <i>Artemia salina</i> )                                                         | <i>Vibrio</i> species ( <i>V. alginolyticus</i> , <i>V. harveyi</i> and <i>V. parahaemolyticus</i> ) | $\phi$ St2 and $\phi$ Grn1 phages were isolated from water samples collected from two locations of the north coastline of Crete, Greece; phage mixture was directly added to water | Decrease of the initial total <i>Vibrio</i> load              | [35]             |
| 12 | Atlantic salmon ( <i>Salmo salar</i> )                                                 | <i>Vibrio anguillarum</i>                                                                            | Bacteriophage CHOED isolated from bivalve samples was directly added to water                                                                                                      | Reduced mortality of fish                                     | [77]             |
| 13 | Atlantic cod ( <i>Gadus morhua</i> ) and turbot ( <i>Scophthalmus maximus</i> ) larvae | <i>Vibrio anguillarum</i>                                                                            | KVP40 bacteriophage isolated from sea water was added to eggs in presence of bacteria                                                                                              | Reduced and/or delayed mortality of the cod and turbot larvae | [57]             |
| 14 | Zebrafish ( <i>Danio rerio</i> )                                                       | <i>Vibrio anguillarum</i>                                                                            | Bacteriophage isolated from sewage water from a lift station in Aveiro, Portugal was directly added to water                                                                       | Reduced mortality of fish                                     | [82]             |
| 15 | Sea cucumbers ( <i>Apostichopus japonicus</i> )                                        | <i>Vibrio splendidus</i>                                                                             | Three bacteriophages isolated from hatchery raw sewage (VS-1, PVS-2 and PVS-3) were fed to animals separately or in cocktail of 3 phages                                           | Reduced mortality of sea cucumbers                            | [16]             |

|    | <b>Treated aquaculture product</b>                                                            | <b>Bacterial pathogen</b>                                      | <b>Bacteriophage, its source and way of administration</b>                                                                                                                                | <b>Results of phage therapy</b>                                                             | <b>Reference</b> |
|----|-----------------------------------------------------------------------------------------------|----------------------------------------------------------------|-------------------------------------------------------------------------------------------------------------------------------------------------------------------------------------------|---------------------------------------------------------------------------------------------|------------------|
| 16 | Sea cucumbers<br>( <i>Apostichopus japonicus</i> )                                            | <i>Vibrio cyclitrophicus</i>                                   | Phage vB_VcyS_Vc1 was isolated from hatchery raw sewage obtained from the drain-pipes; bacteriophages were administrated by feeding with phage powder, immersion or injection             | Reduced mortality of sea cucumbers                                                          | [85]             |
| 17 | Brook trout<br>( <i>Salvelinus fontinalis</i> )                                               | <i>Aeromonas salmonicida</i>                                   | Bacteriophage HER 110 isolated from the La Petite Mouge River in France was directly added to water                                                                                       | Reduced mortality of fish                                                                   | [34]             |
| 18 | Atlantic salmon<br>( <i>Salmo salar</i> ) and rainbow trout<br>( <i>Oncorhynchus mykiss</i> ) | <i>Aeromonas salmonicida</i>                                   | O, R and B phages, isolated at fish farms and water reservoirs in UK and France, were administered by injection, orally and by immersion                                                  | Slower rate of dying but 100% mortality was achieved as in control group                    | [86]             |
| 19 | African sharptooth catfish ( <i>Clarias gariepinus</i> )                                      | <i>Pseudomonas aeruginosa</i>                                  | Bacteriophage isolated from the wastewater was applied to the infected skin lesion with sterile cotton swab                                                                               | Reduction of ulcerative lesion on infected fish                                             | [83]             |
| 20 | Ayu fish ( <i>Plecoglossus altivelis</i> )                                                    | <i>Pseudomonas plecoglossicida</i>                             | One <i>Myoviridae</i> and one <i>Podoviridae</i> phages were isolated from diseased ayu and culture pond water and administered orally in feed                                            | Reduced mortality of fish                                                                   | [17]             |
| 21 | Rainbow trout<br>( <i>Oncorhynchus mykiss</i> ) and zebrafish<br>( <i>Danio rerio</i> )       | <i>Flavobacterium columnare</i>                                | FCL-2 phage was isolated from a fish farm and was added directly to water                                                                                                                 | Reduced mortality of fish                                                                   | [79]             |
| 22 | European eels<br>( <i>Anguilla anguilla</i> )                                                 | <i>Aeromonas hydrophila</i> and <i>Pseudomonas fluorescens</i> | Fish were fed with bacteriophage cocktail BAFADOR® containing 3 bacteriophages against <i>Aeromonas hydrophila</i> and 4 against <i>Pseudomonas fluorescens</i>                           | Stimulation of cellular and humoral immunity and reduction of mortality of the European eel | [36]             |
| 23 | Rainbow trout<br>( <i>Oncorhynchus mykiss</i> )                                               | <i>Aeromonas hydrophila</i> and <i>Pseudomonas fluorescens</i> | Bacteriophage cocktail BAFADOR®, containing 3 bacteriophages against <i>Aeromonas hydrophila</i> and 4 against <i>Pseudomonas fluorescens</i> , was used for immersion or feeding of fish | Stimulation of non-specific immune system and reduction of mortality of rainbow trout       | [68]             |

|    | <b>Treated aquaculture product</b>               | <b>Bacterial pathogen</b>    | <b>Bacteriophage, its source and way of administration</b>            | <b>Results of phage therapy</b>                             | <b>Reference</b> |
|----|--------------------------------------------------|------------------------------|-----------------------------------------------------------------------|-------------------------------------------------------------|------------------|
| 24 | Senegalese sole<br>( <i>Solea senegalensis</i> ) | <i>Aeromonas salmonicida</i> | Phage AS-A isolated from sewage water was added directly to the water | No mortality of challenged fish, reduced number of bacteria | [29]             |
